# Supplementary material
Source: PubMed Central journal article supplement (PMC8353801)
Supplement: 12879_2021_6443_MOESM1_ESM.pdf [file 12879_2021_6443_MOESM1_ESM.pdf]

# COVID-LIV Form 4 Weekly Follow-Up

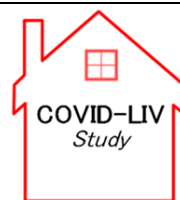

Household ID Number

Date of timepoint: d d m m 20 y y

Timepoint of follow up Week 1  Week 2  Week 3  Week 4  Week 5

Week 6  Week 7  Week 8  Week 9  Week 10  Week 11  Week 12

## Who is completing this form?

Are you completing this form about yourself? Yes  If yes, please provide your own Household Member ID Number:

No  If no, please provide the Household Member ID Number of the person you are completing on behalf of:

In no, please indicate which type of informant you are: Parent  Spouse, sibling or child

Grandparent, Grandchild or other relative

Non-relative

## Questions about the household individual start here.

Is the household member still present? Yes  No  If no, please select the reason below

L Left, H Hospitalised, D Deceased, O other, NK Not Known  If other, please specify \_\_\_\_\_

### Section 1 - Work undertaken outside of the home

During the last week, did you undertake paid employment? Yes  No

During the last week, did you undertake non paid work? Yes  No

During the last week, did you leave the house to work? Yes  No

If yes how many times?  Estimate how many hours

# COVID-LIV Form 4 Weekly Follow-Up

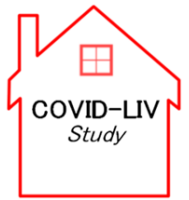

Household ID Number

## Section 2 - Medical History

Are you currently ill? Yes  No  If no, skip to Section 3

|                                        |                              |                             |                   |                      |                      |                      |
|----------------------------------------|------------------------------|-----------------------------|-------------------|----------------------|----------------------|----------------------|
| Cough                                  | Yes <input type="checkbox"/> | No <input type="checkbox"/> | Duration of days: | <input type="text"/> | <input type="text"/> | <input type="text"/> |
| Fever                                  | Yes <input type="checkbox"/> | No <input type="checkbox"/> | Duration of days: | <input type="text"/> | <input type="text"/> | <input type="text"/> |
| Sore throat                            | Yes <input type="checkbox"/> | No <input type="checkbox"/> | Duration of days: | <input type="text"/> | <input type="text"/> | <input type="text"/> |
| Headache                               | Yes <input type="checkbox"/> | No <input type="checkbox"/> | Duration of days: | <input type="text"/> | <input type="text"/> | <input type="text"/> |
| Breathing difficulty                   | Yes <input type="checkbox"/> | No <input type="checkbox"/> | Duration of days: | <input type="text"/> | <input type="text"/> | <input type="text"/> |
| Diarrhoea                              | Yes <input type="checkbox"/> | No <input type="checkbox"/> | Duration of days: | <input type="text"/> | <input type="text"/> | <input type="text"/> |
| Rash                                   | Yes <input type="checkbox"/> | No <input type="checkbox"/> | Duration of days: | <input type="text"/> | <input type="text"/> | <input type="text"/> |
| Chest pain                             | Yes <input type="checkbox"/> | No <input type="checkbox"/> | Duration of days: | <input type="text"/> | <input type="text"/> | <input type="text"/> |
| Disturbance or loss of smell (Anosmia) | Yes <input type="checkbox"/> | No <input type="checkbox"/> | Duration of days: | <input type="text"/> | <input type="text"/> | <input type="text"/> |
| Abdominal pain                         | Yes <input type="checkbox"/> | No <input type="checkbox"/> | Duration of days: | <input type="text"/> | <input type="text"/> | <input type="text"/> |
| Muscle aches & pains                   | Yes <input type="checkbox"/> | No <input type="checkbox"/> | Duration of days: | <input type="text"/> | <input type="text"/> | <input type="text"/> |
| Other - Specify _____                  | Yes <input type="checkbox"/> | No <input type="checkbox"/> | Duration of days: | <input type="text"/> | <input type="text"/> | <input type="text"/> |
| Other - Specify _____                  | Yes <input type="checkbox"/> | No <input type="checkbox"/> | Duration of days: | <input type="text"/> | <input type="text"/> | <input type="text"/> |
| Other - Specify _____                  | Yes <input type="checkbox"/> | No <input type="checkbox"/> | Duration of days: | <input type="text"/> | <input type="text"/> | <input type="text"/> |

## Section 3 - Recent movement

In the past week, excluding work undertaken outside of the home, have you been out of the house?

Yes  No  If no, skip to Section 4

If yes please complete the number of times for each activity below, please provide a '0' if applicable.

If you left the house 1 or more times to complete an activity please provide the number of hours you spent outside the house

| Reason                           | Number of times (estimate) | Number of hours (estimate) |
|----------------------------------|----------------------------|----------------------------|
| Shopping                         | <input type="text"/>       | <input type="text"/>       |
| Exercise                         | <input type="text"/>       | <input type="text"/>       |
| School/Taking children to school | <input type="text"/>       | <input type="text"/>       |
| Other, specify reason below      |                            |                            |
| 1) _____                         | <input type="text"/>       | <input type="text"/>       |
| 2) _____                         | <input type="text"/>       | <input type="text"/>       |
| 3) _____                         | <input type="text"/>       | <input type="text"/>       |

# COVID-LIV Form 4 Weekly Follow-Up

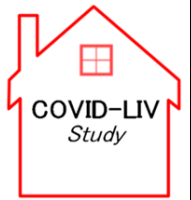

Household ID Number

## Section 4 - Contact in house

In the past 7 days have you eaten meals with other members of the household? Yes  No

If yes, on how many out of the 7 days?

If yes, what is the maximum number of people you have had a meal with?

In the past 7 days have you watched television/gaming with other members of the household? Yes  No

If yes, on how many out of the 7 days?

If yes, what is the maximum number of people you have watched with?

In the past 7 days have you slept in the same room as anyone else in the household? Yes  No

If yes, do you sleep in the same bed? Yes  No

## Section 5 - COVID-19 in the household?

Other than yourself is there a case of COVID-19 in the household? Yes  No  If yes, please answer the following.

Since the ill household member began to have symptoms, on average per day how many hours have you spent in the same room?

Since the day symptoms began for the ill household member have you:

Slept in the same room as the household member who is ill? Yes  No

Hugged or embraced the household member who is ill? Yes  No

Assisted the household member who is ill with the toilet (including changing their nappy)? Yes  No

Assisted the household member who is ill with washing? Yes  No

Assisted the household member who is ill with walking? Yes  No

Failed to wash hands after caring for household member who is ill? Yes  No

Shared a hand towel with household member who is ill? Yes  No

Worn a face mask in the house? Yes  No

Eaten food prepared by the household member who is ill? Yes  No

## Section 6 - Samples

Nasal swab taken Yes  No
